# Supplementary material for: Constructing a novel prognostic model for triple-negative breast cancer based on genes associated with vasculogenic mimicry
Source: publisher site journal article supplement (doi:10.18632/aging.205806), 2024-05-08
Supplement: Supplementary file [file aging-v16i9-205806-supplementary-material-SD2.pdf]

## SUPPLEMENTARY TABLE

**Supplementary Table 1. 24 VM.**

---

ID  
TFPI  
SERPINF1  
TF  
MAPK1  
PIK3CA  
ROCK1  
VEGFA  
NOTCH1  
ROCK2  
MAPK3  
EPHA2  
LAMC2  
CDH5  
KDR  
PTGS2  
MMP9  
SNAI1  
TWIST1  
MMP2  
LOXL2  
TFPI2  
SNAI2  
TGFB1  
TWIST2

---
