# Supplementary material for: Constructing a novel prognostic model for triple-negative breast cancer based on genes associated with vasculogenic mimicry
Source: Aging (Albany NY). 2024 May 8;16(9):8086–109. doi: 10.18632/aging.205806 (PMC11132006; doi:10.18632/aging.205806)
Supplement: Supplementary Table 7 [file aging-16-205806-s008.xls]

## Sheet: Sheet0
Supplementary Table 7. Pathway.
© 2000-2023 QIAGEN. All rights reserved.
Ingenuity Canonical Pathways	-log(p-value)	Ratio	z-score	Molecules
Hepatic Fibrosis / Hepatic Stellate Cell Activation	14.3	0.211	#NUM!	ACTA2,CCN2,COL10A1,COL11A1,COL12A1,COL18A1,COL1A1,COL1A2,COL24A1,COL2A1,COL3A1,COL4A6,COL5A1,COL5A2,COL5A3,COL6A3,COL9A3,EDNRA,EDNRB,FGF1,FN1,HGF,IGF1,IGF2,IGFBP4,IGFBP5,IL1A,IL1R2,LEP,MYH11,MYH13,MYH4,MYH8,MYL3,NGFR,PDGFRA,PDGFRB,PROK1,TGFB3,VEGFD
Wound Healing Signaling Pathway	11	0.168	3.162	ACTA2,CALCA,CMA1,COL10A1,COL11A1,COL12A1,COL18A1,COL1A1,COL1A2,COL24A1,COL2A1,COL3A1,COL4A6,COL5A1,COL5A2,COL5A3,COL6A3,COL9A3,FGF7,FN1,IL12A,IL17B,IL1A,IL1R2,IL33,IL36G,KRT16,KRT6A,LAMA2,LEP,MMP10,NGFR,PROK1,RASD1,TAC1,TGFB3,TNFSF11,TNFSF9,TRPA1,VEGFD
Dilated Cardiomyopathy Signaling Pathway	8.92	0.187	0.471	ACTA1,ACTA2,ACTG2,ADCY1,ADCY5,ADCY8,ADRB1,CACNA1C,CACNA1G,CACNA1H,CACNA2D2,CACNG5,CACNG8,CNN1,DES,GUCY1A1,LAMA4,MYH11,MYH13,MYH4,MYH8,MYL3,PDE2A,PLN,RBM20,SGCD,TNNI3,TNNT2
CREB Signaling in Neurons	7.92	0.106	6.53	ACKR1,ACKR4,ADCY1,ADCY5,ADCY8,ADCYAP1R1,ADGRA2,ADGRB1,ADRA2A,ADRB1,ADRB3,APLNR,AVPR1A,AVPR2,CACNA1C,CACNA1G,CACNA1H,CACNA2D2,CACNG5,CACNG8,CALCR,CCKAR,CX3CR1,EDNRA,EDNRB,F2R,F2RL2,GLP2R,GNG4,GPR142,GPR63,GRIA1,GRIA2,GRIA3,GRID1,GRIK3,GRIN2C,GRPR,GUCY1A1,HGF,HTR1F,HTR6,IGF1,LGR5,LPAR4,MAS1L,MC5R,NGFR,NPY4R/NPY4R2,NTRK1,OXTR,P2RY12,PDGFRA,PDGFRB,PLCL1,PTGDR,PTGER3,PTH1R,RASD1,RXFP3,S1PR1,SLC52A1,XC…
Cellular Effects of Sildenafil (Viagra)	6.82	0.168	#NUM!	ACTA1,ACTA2,ACTG2,ADCY1,ADCY5,ADCY8,CACNA1C,CACNA2D2,CACNG5,CACNG8,GUCY1A1,GUCY1A2,MYH11,MYH13,MYH4,MYH8,MYL3,MYLK,NPR1,PDE1A,PDE1B,PDE2A,PLCL1,PRKG1
Airway Pathology in Chronic Obstructive Pulmonary Disease	6.82	0.186	#NUM!	AMBP,APOD,CTSG,ELANE,FGF1,FGF10,FGF7,IL12A,IL17B,IL1A,IL33,IL36G,LCN10,LCN6,LEP,ORM1,ORM2,PTGDS,TGFB3,TNFSF11,TNFSF9
Atherosclerosis Signaling	6.49	0.172	#NUM!	APOA2,APOD,APOF,CMA1,COL10A1,COL18A1,COL1A1,COL1A2,COL2A1,COL3A1,COL5A3,CXCL12,IL1A,IL33,IL36G,ORM1,ORM2,PLA2G2C,PLA2G4D,PLA2G5,PLAAT5,SELP
Agranulocyte Adhesion and Diapedesis	6.47	0.145	#NUM!	ACKR4,ACTA1,ACTA2,ACTG2,AOC3,CCL14,CCL16,CLDN18,CLDN5,CLDN6,CXCL10,CXCL12,CXCL14,CXCL5,CXCL6,FN1,IL1A,IL33,IL36G,MMP10,MMP11,MMP16,MYH11,MYH13,MYH4,MYH8,MYL3,SELP
Intrinsic Prothrombin Activation Pathway	6.36	0.293	2.309	COL10A1,COL18A1,COL1A1,COL1A2,COL2A1,COL3A1,COL5A3,F12,F5,KLK14,KLK2,KLK3
Osteoarthritis Pathway	5.8	0.129	0.426	ACAN,ALPP,C1QTNF4,CCN4,CNMD,COL10A1,COL2A1,CTNNA2,DCN,FN1,FRZB,GLI2,GLIS1,GREM1,HTRA1,IL1R2,ITGA1,ITGA11,ITGA8,LEP,LRP1,MATN3,MMP10,NKX3-2,PROK1,PTH1R,RUNX2,SERPINA12,TIMP3,VEGFD
Apelin Liver Signaling Pathway	5.59	0.346	3	APLNR,COL10A1,COL18A1,COL1A1,COL1A2,COL2A1,COL3A1,COL5A3,PDGFRB
Amyotrophic Lateral Sclerosis Signaling	5.49	0.167	2.496	CACNA1C,CACNA2D2,CACNG5,CACNG8,CAPN11,CAPN3,CAPN8,GRIA1,GRIA2,GRIA3,GRID1,GRIK3,GRIN2C,IGF1,NEFH,NEFL,PROK1,SLC1A2,VEGFD
White Adipose Tissue Browning Pathway	5.4	0.153	3.71	ADCY1,ADCY5,ADCY8,ADRB3,CACNA1C,CACNA1G,CACNA1H,CACNA2D2,CACNG5,CACNG8,DIO2,GUCY1A1,GUCY1A2,LEP,LIPE,MS4A2,NDN,NPR1,PRDM16,PRKG1,RUNX1T1
Neurovascular Coupling Signaling Pathway	5.36	0.128	1.134	CACNA1C,CACNA1G,CACNA1H,CACNA2D2,CACNG5,CACNG8,GABRA5,GABRE,GAD1,GAST,GRIA1,GRIA2,GRIA3,GRIN2C,GUCY1A1,GUCY1A2,KCNJ12,KCNJ8,KCNMA1,MAPT,NPR1,PLA2G2C,PLA2G4D,PLA2G5,PLAAT5,PRKG1,SLC1A2,SLCO2A1
Circadian Rhythm Signaling	5.12	0.118	#NUM!	ADCY1,ADCY5,ADCY8,ADCYAP1R1,ADRB1,BLK,CACNA1C,CACNA1G,CACNA1H,CACNA2D2,CACNG5,CACNG8,GAD1,GAST,GNG4,GRIA1,GRIA2,GRIA3,GRIN2C,GRP,GRPR,GUCY1A1,GUCY1A2,KLK3,NGFR,NPR1,PLCL1,PRKG1,PTGDS,RASD1,TRPC6
Role Of Osteoclasts In Rheumatoid Arthritis Signaling Pathway	5.02	0.113	3.9	ADAM12,ADAM23,ADAM29,ADAM33,CALCR,COL10A1,COL11A1,COL12A1,COL18A1,COL1A1,COL1A2,COL24A1,COL2A1,COL3A1,COL4A6,COL5A1,COL5A2,COL5A3,COL6A3,COL9A3,CTNNA2,CTSK,FRZB,IL1R2,MMP10,MMP11,MMP16,NGFR,RASD1,RND1,SFRP2,SFRP4,TNFSF11
Pulmonary Fibrosis Idiopathic Signaling Pathway	4.92	0.109	5.396	ACTA1,ACTA2,ACTG2,CCN2,CCN4,COL10A1,COL11A1,COL12A1,COL18A1,COL1A1,COL1A2,COL24A1,COL2A1,COL3A1,COL4A6,COL5A1,COL5A2,COL5A3,COL6A3,COL9A3,CXCL12,EDNRA,F2R,FN1,GLI2,MMP10,MMP11,MMP16,NOX4,PDGFRA,PDGFRB,RASD1,SFTPA2,TGFB3,WNT9B
Nicotine Degradation II	4.9	0.218	1.732	ADH7,CYP1A1,CYP2C18,CYP2F1,CYP4B1,FMO1,INMT,LARGE1,UGT2B11,UGT2B15,UGT2B17,UGT2B28
Pathogen Induced Cytokine Storm Signaling Pathway	4.79	0.106	3.333	CCL14,CCL16,COL10A1,COL11A1,COL12A1,COL18A1,COL1A1,COL1A2,COL24A1,COL2A1,COL3A1,COL4A6,COL5A1,COL5A2,COL5A3,COL6A3,COL9A3,CXCL10,CXCL12,CXCL14,CXCL5,CXCL6,IL12A,IL17B,IL1A,IL1R2,IL33,IL36G,LEP,NGFR,NLRP4,PROK1,TGFB3,TNFSF11,TNFSF9,VEGFD
Oxytocin In Spinal Neurons Signaling Pathway	4.75	0.281	1.667	AVPR1A,GAD1,GAST,GUCY1A1,GUCY1A2,KCNJ8,NPR1,OXTR,PRKG1
RAR Activation	4.71	0.0995	2.03	ADCY1,ADCY5,ADCY8,ADH1C,ADH7,ALDH1A3,BCO1,CNGB1,COL10A1,COL1A1,COL1A2,COL3A1,DLK1,ENPP1,FGF10,GATA4,GRIA1,GUCY1A1,IL12A,IL17B,IL1A,IL33,IL36G,LEP,LIPE,LRAT,MMP11,NR2F1,PAX6,PDE1A,PDE1B,PDE2A,PRDM16,RDH10,RND1,RPE65,TBX5,TGFB3,TNFSF11,TNFSF9,ZBTB16
Gustation Pathway	4.68	0.125	2.449	ADCY1,ADCY5,ADCY8,ASIC2,CACNA1C,CACNA1G,CACNA1H,CACNA2D2,CACNG5,CACNG8,GABRA5,GABRE,GUCY1A1,KCNJ12,KCNJ8,LIPE,LIPF,LIPM,P2RY12,SCN2B,SCN3B,SCN4B,SCN7A,SCNN1A,SCNN1B
Phagosome Formation	4.53	0.0864	5.515	ACKR1,ACKR4,ADCYAP1R1,ADGRA2,ADGRB1,ADRA2A,ADRB1,ADRB3,APLNR,AVPR1A,AVPR2,CALCR,CCKAR,CLEC4E,CX3CR1,EDNRA,EDNRB,F2R,F2RL2,FCER2,FN1,GLP2R,GPR142,GPR63,GRPR,HTR1F,HTR6,ITGA1,ITGA11,ITGA8,LGR5,LPAR4,MARCO,MAS1L,MC5R,MYH11,MYH13,MYH4,MYH8,MYL3,MYLK,NPY4R/NPY4R2,OXTR,P2RY12,PLA2G2C,PLA2G4D,PLA2G5,PLAAT5,PLD5,PTGDR,PTGER3,PTH1R,RASD1,RXFP3,S1PR1,SCARA5,SLC52A1,XCR1
GP6 Signaling Pathway	4.44	0.146	4.243	COL10A1,COL11A1,COL12A1,COL18A1,COL1A1,COL1A2,COL24A1,COL2A1,COL3A1,COL4A6,COL5A1,COL5A2,COL5A3,COL6A3,COL9A3,LAMA2,LAMA4,RASGRP2
S100 Family Signaling Pathway	4.24	0.0828	5.588	ACKR1,ACKR4,ADCYAP1R1,ADGRA2,ADGRB1,ADRA2A,ADRB1,ADRB3,APLNR,AVPR1A,AVPR2,CACNA1C,CACNA1G,CACNA1H,CACNA2D2,CACNG5,CACNG8,CALCR,CCKAR,CX3CR1,DLC1,EDNRA,EDNRB,ESR1,F2R,F2RL2,GLP2R,GPR142,GPR63,GRPR,HTR1F,HTR6,KLK3,LGR5,LPAR4,MAS1L,MC5R,MMP10,MMP11,MMP16,NKX2-1,NOX4,NPY4R/NPY4R2,OXTR,P2RY12,PLA2G4D,PLA2G5,PLCL1,PROK1,PTGDR,PTGER3,PTH1R,RXFP3,S100A14,S100A2,S100Z,S1PR1,SLC52A1,TGFB3,VEGFD,WNT9B,XCR1
Tumor Microenvironment Pathway	4.12	0.124	4.146	COL1A1,COL1A2,COL3A1,CSPG4,CXCL12,FGF1,FGF10,FGF7,FN1,HGF,IDO1,IGF1,IGF2,LEP,MMP10,MMP11,MMP16,PROK1,RASD1,TGFB3,TNC,VEGFD
Synaptic Long Term Depression	4.11	0.12	3.9	CACNA1C,CACNA1G,CACNA1H,CACNA2D2,CACNG5,CACNG8,GAD1,GAST,GRIA1,GRIA2,GRIA3,GRID1,GUCY1A1,GUCY1A2,IGF1,NPR1,PLA2G2C,PLA2G4D,PLA2G5,PLAAT5,PLCL1,PRKG1,RASD1
Activin Inhibin Signaling Pathway	3.93	0.115	2.449	CCN2,CCNA1,COL10A1,COL18A1,COL1A1,COL1A2,COL2A1,COL3A1,COL5A3,FOSL1,IL1A,IL1R2,IL33,IL36G,KL,LIPE,NGFR,PAX1,PAX2,PAX3,PAX5,PAX6,SOX17,TGFB3
Nitric Oxide Signaling in the Cardiovascular System	3.84	0.142	2.309	ADRB1,ADRB3,CACNA1C,CACNA2D2,CACNG5,CACNG8,GUCY1A1,GUCY1A2,NPR1,PDE1A,PDE1B,PDE2A,PLN,PRKG1,PROK1,VEGFD
Nicotine Degradation III	3.84	0.2	1.265	ADH7,CYP1A1,CYP2C18,CYP2F1,CYP4B1,LARGE1,UGT2B11,UGT2B15,UGT2B17,UGT2B28
Role Of Osteoblasts In Rheumatoid Arthritis Signaling Pathway	3.75	0.11	1.8	COL1A1,CTSG,CTSK,CXCL12,FRZB,IGF1,IL12A,IL17B,IL1A,IL33,IL36G,LEP,LRP1,MMP10,MMP11,MMP16,PROK1,RUNX2,SFRP2,SFRP4,TGFB3,TNFSF11,TNFSF9,VEGFD,WNT9B
cAMP-mediated signaling	3.66	0.108	4.146	ADCY1,ADCY5,ADCY8,ADRA2A,ADRB1,ADRB3,AKAP12,APLNR,AVPR2,CNGB1,ENPP1,GUCY1A1,HTR1F,HTR6,MC5R,P2RY12,PALM2AKAP2,PDE1A,PDE1B,PDE2A,PTGDR,PTGER3,PTH1R,S1PR1,XCR1
Axonal Guidance Signaling	3.61	0.0874	#NUM!	ADAM12,ADAM23,ADAM29,ADAM33,ADAMTS12,ADAMTS14,ADAMTS15,ADAMTS16,ADAMTS7,ARHGEF15,BMP8A,CXCL12,EFNA2,GDF7,GLI2,GLIS1,GNG4,IGF1,ITGA1,ITGA11,ITGA8,KCNJ12,LRRC4C,MMP10,MMP11,MMP16,MYL3,NGFR,NRP1,NTN4,NTRK1,PAPPA2,PLCL1,PROK1,RASD1,RND1,SEMA5A,SEMA6D,SLIT2,SLIT3,UNC5C,VEGFD,WNT9B
Gap Junction Signaling	3.58	0.113	#NUM!	ACTA1,ACTA2,ACTG2,ADCY1,ADCY5,ADCY8,ADRB1,GAD1,GAST,GJA4,GJB1,GJB3,GRIA1,GRIA2,GRIA3,GRIK3,GUCY1A1,GUCY1A2,NPR1,PLCL1,PRKG1,RASD1
GPCR-Mediated Integration of Enteroendocrine Signaling Exemplified by an L Cell	3.57	0.162	-0.302	ADCY1,ADCY5,ADCY8,ADRB1,ADRB3,CALCA,CCKAR,GLP2R,GRP,GRPR,GUCY1A1,PLCL1
SPINK1 Pancreatic Cancer Pathway	3.48	0.182	-0.632	CPA3,CPB1,CPE,CPZ,ELANE,KLK14,KLK2,KLK3,PRSS1,PRSS3
Calcium Signaling	3.46	0.109	2.496	ACTA1,ACTA2,CACNA1C,CACNA1G,CACNA1H,CACNA2D2,CACNG5,CACNG8,CASQ2,CHRNA9,GRIA1,GRIA2,GRIA3,GRIN2C,MYH11,MYH13,MYH4,MYH8,MYL3,SLC8A2,TNNI3,TNNT2,TRPC6
G-Protein Coupled Receptor Signaling	3.44	0.0798	4.899	ACKR1,ACKR4,ADCY1,ADCY5,ADCY8,ADCYAP1R1,ADGRA2,ADGRB1,ADRA2A,ADRB1,ADRB3,APLNR,AVPR1A,AVPR2,CALCR,CCKAR,CNGB1,CX3CR1,EDNRA,EDNRB,ENPP1,F2R,F2RL2,GLP2R,GNG4,GPR142,GPR63,GRPR,GUCY1A1,HCN4,HTR1F,HTR6,LGR5,LPAR4,MAS1L,MC5R,MEGF6,MYL3,MYLK,NPY4R/NPY4R2,OXTR,P2RY12,PDE1A,PDE1B,PDE2A,PREX1,PREX2,PTGDR,PTGER3,PTH1R,RASD1,RXFP3,S1PR1,SLC52A1,XCR1
Hepatic Fibrosis Signaling Pathway	3.4	0.0896	4.382	ACTA2,CACNA1C,CACNA2D2,CACNG5,CACNG8,CCN2,COL10A1,COL18A1,COL1A1,COL1A2,COL2A1,COL3A1,COL5A3,EDNRA,GLI2,GLIS1,IL1A,IL1R2,IL33,IL36G,ITGA1,ITGA11,ITGA8,LEP,LRP1,MYL3,MYLK,NGFR,NOX4,PDGFRA,PDGFRB,PROK1,RASD1,RND1,TGFB3,VEGFD,WNT9B
Granulocyte Adhesion and Diapedesis	3.38	0.115	#NUM!	ACKR4,CCL14,CCL16,CLDN18,CLDN5,CLDN6,CXCL10,CXCL12,CXCL14,CXCL5,CXCL6,IL1A,IL1R2,IL33,IL36G,MMP10,MMP11,MMP16,NGFR,SELP
Inhibition of Matrix Metalloproteases	3.33	0.211	-0.816	ADAM12,HSPG2,LRP1,MMP10,MMP11,MMP16,THBS2,TIMP3
Oxytocin Signaling Pathway	3.25	0.0985	3.138	CACNA1C,CACNA2D2,CACNG5,CACNG8,GAD1,GAST,GNG4,GUCY1A1,GUCY1A2,HSPB7,KCNJ8,LEP,LIPE,MYH11,MYH13,MYH4,MYH8,MYL3,MYLK,NPR1,OXTR,PLA2G4D,PLA2G5,PPP1R14A,PRKG1,RASD1,TNFSF11
Cardiac Hypertrophy Signaling (Enhanced)	3.23	0.0832	3.157	ADCY1,ADCY5,ADCY8,ADRA2A,ADRB1,CACNA1C,CACNA2D2,CACNG5,CACNG8,EDNRA,EDNRB,ENPP1,FGF1,FGF10,FGF7,GATA4,GNG4,GUCY1A1,HSPB7,IGF1,IL12A,IL17B,IL1A,IL1R2,IL20RB,IL33,IL36G,ITGA1,ITGA11,ITGA8,LEP,NGFR,NPR1,PDE1A,PDE1B,PDE2A,PLCL1,PLN,PRKG1,RASD1,TGFB3,TNFSF11,TNFSF9,WNT9B
FAK Signaling	3.09	0.075	4.826	ACKR1,ACKR4,ADCYAP1R1,ADGRA2,ADGRB1,ADRA2A,ADRB1,ADRB3,APLNR,AVPR1A,AVPR2,CALCR,CAPN11,CAPN3,CAPN8,CCKAR,COL10A1,COL18A1,COL1A1,COL1A2,COL2A1,COL3A1,COL5A3,CX3CR1,ECM2,EDNRA,EDNRB,EFNA2,F2R,F2RL2,GLP2R,GPR142,GPR63,GRPR,HTR1F,HTR6,IL1R2,IL20RB,IL33,ITGA1,ITGA11,ITGA8,LGR5,LPAR4,MAS1L,MC5R,NPY4R/NPY4R2,OXTR,P2RY12,PDGFRA,PDGFRB,PTGDR,PTGER3,PTH1R,RASD1,RXFP3,S1PR1,SLC52A1,SOCS2,SPARCL1,TGFB3,XCR1
Thyroid Hormone Metabolism II (via Conjugation and/or Degradation)	3	0.212	2.646	DIO2,DIO3,LARGE1,UGT2B11,UGT2B15,UGT2B17,UGT2B28
Endocannabinoid Neuronal Synapse Pathway	2.96	0.115	2.138	ADCY1,ADCY5,ADCY8,CACNA1C,CACNA1G,CACNA1H,CACNA2D2,CACNG5,CACNG8,DNALI1,GNG4,GRIA1,GRIA2,GRIA3,GRIN2C,GUCY1A1,PLCL1
Melatonin Degradation I	2.9	0.167	1.667	CYP1A1,CYP2C18,CYP2F1,CYP4B1,LARGE1,UGT2B11,UGT2B15,UGT2B17,UGT2B28
Cardiac β-adrenergic Signaling	2.88	0.107	1.265	ADCY1,ADCY5,ADCY8,ADRB1,AKAP12,CACNA1C,CACNA2D2,CACNG5,CACNG8,ENPP1,GNG4,GUCY1A1,PALM2AKAP2,PDE1A,PDE1B,PDE2A,PLN,PPP1R14A,SLC8A2
ABRA Signaling Pathway	2.88	0.136	1.155	ACTA1,ACTA2,ACTG2,CCN2,GATA4,IGF1,MYH11,MYL3,PPP1R14A,PROK1,TAGLN,VEGFD
Breast Cancer Regulation by Stathmin1	2.85	0.0788	5.217	ACKR1,ACKR4,ADCYAP1R1,ADGRA2,ADGRB1,ADRA2A,ADRB1,ADRB3,APLNR,ARHGEF15,AVPR1A,AVPR2,CALCR,CCKAR,CX3CR1,EDNRA,EDNRB,F2R,F2RL2,GLP2R,GNG4,GPR142,GPR63,GRPR,HGF,HTR1F,HTR6,IGF1,LGR5,LPAR4,MAS1L,MC5R,NPY4R/NPY4R2,OXTR,P2RY12,PPP1R14A,PROK1,PTGDR,PTGER3,PTH1R,RASD1,RXFP3,S1PR1,SLC52A1,VEGFD,XCR1
GABA Receptor Signaling	2.7	0.115	#NUM!	ADCY1,ADCY5,ADCY8,CACNA1C,CACNA1G,CACNA1H,CACNA2D2,CACNG5,CACNG8,GABRA5,GABRE,GAD1,GNG4,GUCY1A1,SLC6A1
Semaphorin Neuronal Repulsive Signaling Pathway	2.64	0.11	2.138	ACAN,BCAN,CSPG4,GUCY1A1,GUCY1A2,ITGA1,ITGA11,ITGA8,MAPT,MYL3,NRP1,PRKG1,RND1,SEMA5A,SEMA6D,VCAN
Superpathway of Melatonin Degradation	2.62	0.153	1.667	CYP1A1,CYP2C18,CYP2F1,CYP4B1,LARGE1,UGT2B11,UGT2B15,UGT2B17,UGT2B28
Sperm Motility	2.58	0.0939	2.714	BLK,CACNA1G,CACNA1H,CNGB1,ERBB4,GNG4,GUCY1A1,GUCY1A2,NPR1,NTRK1,PDE1A,PDE1B,PDE2A,PDGFRA,PDGFRB,PLA2G2C,PLA2G4D,PLA2G5,PLAAT5,PLCL1,PRKG1,ROS1,TEK
Corticotropin Releasing Hormone Signaling	2.58	0.109	0	ADCY1,ADCY5,ADCY8,CACNA1C,CACNA1G,CACNA1H,CACNA2D2,CACNG5,CACNG8,GAD1,GAST,GLI2,GUCY1A1,GUCY1A2,NPR1,UCN3
Neuroprotective Role of THOP1 in Alzheimer's Disease	2.43	0.116	1.508	CMA1,CTSG,FAP,HTRA1,HTRA3,KLK3,MAPT,MASP1,PRSS1,PRSS12,PRSS23,PRSS3,TAC1
Serotonin Receptor Signaling	2.4	0.0793	3.333	ADCY1,ADCY5,ADCY8,ADRA2A,ADRB1,ADRB3,BLK,CACNA1C,CACNA1G,CACNA1H,CACNA2D2,CACNG5,CACNG8,CPE,GNG4,GUCY1A1,HTR6,IL12A,IL33,LEP,LIPE,MAPT,MYLK,PLA2G2C,PLA2G4D,PLA2G5,PLAAT5,PLCL1,PLD5,PLN,RASD1,RND1,TGFB3,TNNI3,TRPA1,TRPC6
Maturity Onset Diabetes of Young (MODY) Signaling	2.33	0.13	#NUM!	APOA2,APOD,APOF,APOL5,BLK,CACNA1C,CACNA2D2,CACNG5,CACNG8,KCNJ8
Hepatic Cholestasis	2.3	0.0973	#NUM!	ADCY1,ADCY5,ADCY8,ESR1,GUCY1A1,IL12A,IL17B,IL1A,IL1R2,IL33,IL36G,LEP,NGFR,SLCO1B3,SLCO1C1,TGFB3,TNFSF11,TNFSF9
GPCR-Mediated Nutrient Sensing in Enteroendocrine Cells	2.27	0.111	2.309	ADCY1,ADCY5,ADCY8,CACNA1C,CACNA1G,CACNA1H,CACNA2D2,CACNG5,CACNG8,GAST,GNG4,GUCY1A1,PLCL1
Serotonin Degradation	2.17	0.14	2.121	ADH1C,ADH7,ALDH1A3,LARGE1,UGT2B11,UGT2B15,UGT2B17,UGT2B28
Thyronamine and Iodothyronamine Metabolism	2.15	0.667	#NUM!	DIO2,DIO3
Thyroid Hormone Metabolism I (via Deiodination)	2.15	0.667	#NUM!	DIO2,DIO3
nNOS Signaling in Skeletal Muscle Cells	2.15	0.152	#NUM!	CACNA1C,CACNA1G,CACNA1H,CACNA2D2,CACNG5,CACNG8,CAPN3
MSP-RON Signaling Pathway	2.12	0.138	#NUM!	ACTA1,ACTA2,ACTG2,F12,IL12A,KLK14,KLK2,KLK3
Gαs Signaling	2.06	0.105	2.53	ADCY1,ADCY5,ADCY8,ADRB1,ADRB3,AVPR2,CNGB1,GNG4,GUCY1A1,HTR6,MC5R,PTGDR,PTH1R
Role Of Chondrocytes In Rheumatoid Arthritis Signaling Pathway	2.01	0.1	1.604	CXCL12,FN1,IL1A,IL1R2,IL33,IL36G,LRP1,MMP10,MMP11,MMP16,NGFR,PROK1,RUNX2,VEGFD
RHOGDI Signaling	1.9	0.0872	-2.53	ACTA1,ACTA2,ACTG2,ARHGAP6,ARHGEF15,CDH11,CDH12,DLC1,ESR1,GNG4,ITGA1,ITGA11,ITGA8,MYH11,MYH13,MYH4,MYH8,MYL3,RND1
Glutamate Receptor Signaling	1.87	0.125	2.449	GNG4,GRIA1,GRIA2,GRIA3,GRID1,GRIK3,GRIN2C,SLC1A2
SNARE Signaling Pathway	1.85	0.0985	3.051	ADCY1,ADCY5,ADCY8,CACNA2D2,GUCY1A1,MYH11,MYH13,MYH4,MYH8,MYL3,SYT10,SYT16,SYT9
Retinol Biosynthesis	1.78	0.143	-0.816	BCO1,CES1,LIPE,LIPF,LRAT,RDH10
Eicosanoid Signaling	1.76	0.119	#NUM!	DPEP1,PLA2G2C,PLA2G4D,PLA2G5,PLAAT5,PTGDR,PTGDS,PTGER3
Gαi Signaling	1.66	0.0929	1.265	ADCY1,ADCY5,ADCY8,ADRA2A,APLNR,GNG4,GUCY1A1,HTR1F,P2RY12,PTGER3,RASD1,S1PR1,XCR1
Tyrosine Degradation I	1.65	0.4	#NUM!	HGD,TAT
Airway Inflammation in Asthma	1.65	0.152	#NUM!	ELANE,IL12A,IL33,PRG2,TGFB3
Protein Kinase A Signaling	1.64	0.0736	0.229	ADCY1,ADCY5,ADCY8,AKAP12,CNGB1,DHH,ENPP1,EYA1,FLNC,GNG4,GUCY1A1,H1-1,LIPE,MYH4,MYL3,MYLK,NGFR,PALM2AKAP2,PDE1A,PDE1B,PDE2A,PHKG1,PLCL1,PLN,PPP1R14A,PTPRD,PTPRT,TGFB3,TNNI3
Role of JAK2 in Hormone-like Cytokine Signaling	1.62	0.121	1.134	IGF1,LALBA,LEP,NPY,PROK1,SOCS2,VEGFD
Endothelin-1 Signaling	1.6	0.0851	0	ADCY1,ADCY5,ADCY8,EDNRA,EDNRB,GUCY1A1,GUCY1A2,NPR1,PLA2G2C,PLA2G4D,PLA2G5,PLAAT5,PLCL1,PLD5,RASD1,SHE
Netrin Signaling	1.59	0.111	2.121	CACNA1C,CACNA1G,CACNA1H,CACNA2D2,CACNG5,CACNG8,PRKG1,UNC5C
Clathrin-mediated Endocytosis Signaling	1.55	0.0825	#NUM!	ACTA1,ACTA2,ACTG2,AMPH,APOA2,APOD,APOF,F2R,FGF1,FGF10,FGF7,IGF1,ORM1,ORM2,PROK1,SH3GL2,VEGFD
Role of Osteoblasts, Osteoclasts and Chondrocytes in Rheumatoid Arthritis	1.55	0.0811	#NUM!	BMP8A,CALCR,COL1A1,CTSK,DKK3,FRZB,IGF1,IL1A,IL1R2,IL33,IL36G,LRP1,NGFR,RUNX2,SFRP2,SFRP4,TNFSF11,WNT9B
Bupropion Degradation	1.54	0.167	0	CYP1A1,CYP2C18,CYP2F1,CYP4B1
Regulation of Cellular Mechanics by Calpain Protease	1.52	0.102	2	CAPN11,CAPN3,CAPN8,CCNA1,CNGB1,ITGA1,ITGA11,ITGA8,RASD1
Adrenomedullin signaling pathway	1.51	0.0829	2.309	ADCY1,ADCY5,ADCY8,GAD1,GAST,GUCY1A1,GUCY1A2,IL1A,IL33,IL36G,MYLK,NPR1,PLCL1,PRKG1,RASD1,SHE
Complement System	1.5	0.139	#NUM!	C4BPA,C6,C7,CFB,MASP1
Aryl Hydrocarbon Receptor Signaling	1.5	0.0884	-0.816	ALDH1A3,CCNA1,CYP1A1,CYP2C18,ESR1,GSTA2,GSTM5,HSPB7,IL1A,NR2F1,TFF1,TGFB3,TYR
Tight Junction Signaling	1.5	0.0843	#NUM!	ACTA1,ACTA2,ACTG2,CLDN18,CLDN5,CLDN6,F2RL2,MYH11,MYH13,MYH4,MYH8,MYL3,MYLK,NGFR,TGFB3
Trehalose Degradation II (Trehalase)	1.49	0.333	#NUM!	HKDC1,TREH
Glycine Cleavage Complex	1.49	0.333	#NUM!	GLDC,OCA2
Multiple Sclerosis Signaling Pathway	1.48	0.081	1.698	C6,C7,CAPN11,CAPN3,CAPN8,GRIN2C,IL12A,IL17B,IL1A,IL33,IL36G,LEP,MASP1,SLC8A2,TGFB3,TNFSF11,TNFSF9
eNOS Signaling	1.48	0.0878	3.317	ADCY1,ADCY5,ADCY8,CCNA1,CHRNA9,CNGB1,ESR1,GUCY1A1,GUCY1A2,LPAR4,PRKG1,PROK1,VEGFD
Opioid Signaling Pathway	1.47	0.0764	2.324	ADCY1,ADCY5,ADCY8,BLK,CACNA1C,CACNA1G,CACNA1H,CACNA2D2,CACNG5,CACNG8,GNG4,GRIN2C,GUCY1A1,PDE1A,PDE1B,PENK,RASD1,RGS5,RGS8,SCN7A,SLC12A5
Dopamine-DARPP32 Feedback in cAMP Signaling	1.46	0.0833	2.53	ADCY1,ADCY5,ADCY8,CACNA1C,CACNA2D2,CACNG5,CACNG8,GRIN2C,GUCY1A1,GUCY1A2,KCNJ12,KCNJ8,PLCL1,PPP1R14A,PRKG1
Synaptogenesis Signaling Pathway	1.45	0.0744	3.13	ADCY1,ADCY5,ADCY8,CACNA2D2,CDH11,CDH12,EFNA2,GRIA1,GRIA2,GRIA3,GRIN2C,GUCY1A1,LRP1,MAPT,NRXN2,RASD1,RASGRP2,SHE,SYT10,SYT16,SYT9,THBS2,THBS4
VDR/RXR Activation	1.43	0.104	-2.236	CALB1,CXCL10,HSD17B2,IGFBP1,IGFBP5,IL12A,RUNX2,TNFSF11
Relaxin Signaling	1.42	0.0861	2.449	ADCY1,ADCY5,ADCY8,ENPP1,GAD1,GAST,GNG4,GUCY1A1,GUCY1A2,NPR1,PDE1A,PDE1B,PDE2A
LXR/RXR Activation	1.37	0.0894	0.302	AMBP,APOA2,APOD,APOF,IL1A,IL1R2,IL33,IL36G,NGFR,ORM1,ORM2
Insulin Secretion Signaling Pathway	1.35	0.0749	2.673	ADCY1,ADCY5,ADCY8,ASIC2,CACNA1C,CACNA1G,CACNA1H,CACNA2D2,CACNG5,CACNG8,CCKAR,CPE,CSH1/CSH2,GUCY1A1,KCNB1,KCNJ8,PCSK1,PLCL1,SCNN1A,SCNN1B
Role of NFAT in Cardiac Hypertrophy	1.32	0.0773	3.207	ADCY1,ADCY5,ADCY8,CACNA1C,CACNA1G,CACNA1H,CACNA2D2,CACNG5,CACNG8,GATA4,GNG4,GUCY1A1,IGF1,PLCL1,RASD1,SLC8A2,TGFB3
Histamine Biosynthesis	1.3	1	#NUM!	HDC
4-hydroxybenzoate Biosynthesis	1.3	1	#NUM!	TAT
4-hydroxyphenylpyruvate Biosynthesis	1.3	1	#NUM!	TAT
Cardiac Hypertrophy Signaling	1.3	0.0748	2.887	ADCY1,ADCY5,ADCY8,ADRA2A,ADRB1,ADRB3,CACNA1C,CACNA2D2,CACNG5,CACNG8,GATA4,GNG4,GUCY1A1,IGF1,MYL3,PLCL1,RASD1,RND1,TGFB3
Leukocyte Extravasation Signaling	1.3	0.0794	0.577	ACTA1,ACTA2,ACTG2,ARHGAP6,CLDN18,CLDN5,CLDN6,CTNNA2,CXCL12,DLC1,EDIL3,MMP10,MMP11,MMP16,TIMP3
Agrin Interactions at Neuromuscular Junction	1.29	0.103	1.342	ACTA1,ACTA2,ACTG2,ERBB4,LAMA2,NRG3,RASD1
Actin Cytoskeleton Signaling	1.27	0.075	3.162	ACTA1,ACTA2,ACTG2,F2R,FGF1,FGF10,FGF7,FN1,ITGA1,ITGA11,ITGA8,MYH11,MYH13,MYH4,MYH8,MYL3,MYLK,RASD1
Estrogen Biosynthesis	1.25	0.119	0.447	CYP1A1,CYP2C18,CYP2F1,CYP4B1,HSD17B2
Oxidative Ethanol Degradation III	1.23	0.133	#NUM!	ALDH1A3,CYP2C18,CYP2F1,CYP2W1
Oxytocin In Brain Signaling Pathway	1.22	0.0773	1.807	CACNA1C,CACNA1G,CACNA1H,CACNA2D2,CACNG5,CACNG8,GNG4,NLRP4,OXTR,PLA2G2C,PLA2G4D,PLA2G5,PLAAT5,RASD1,SLC12A5
ILK Signaling	1.19	0.0765	3.051	ACTA1,ACTA2,ACTG2,FLNC,FN1,LIMS2,MYH11,MYH13,MYH4,MYH8,MYL3,PROK1,RND1,TGFB1I1,VEGFD
IL-12 Signaling and Production in Macrophages	1.19	0.0742	2.183	ADRA2A,APOA2,APOD,APOF,COL10A1,COL18A1,COL1A1,COL1A2,COL2A1,COL3A1,COL5A3,IL12A,ORM1,ORM2,SELP,TGFB3,TNFSF11
Neutrophil Extracellular Trap Signaling Pathway	1.19	0.0681	-1.569	BLK,COL10A1,COL11A1,COL12A1,COL18A1,COL1A1,COL1A2,COL24A1,COL2A1,COL3A1,COL4A6,COL5A1,COL5A2,COL5A3,COL6A3,COL9A3,CTSG,ELANE,MT-ND1,NOX4,PLA2G2C,PLA2G4D,PLA2G5,PLAAT5,PLCL1,SELP
Sphingosine-1-phosphate Signaling	1.18	0.0855	0.707	ADCY1,ADCY5,ADCY8,GUCY1A1,PDGFRA,PDGFRB,PLCL1,RND1,S1PR1,SMPD3
Pulmonary Healing Signaling Pathway	1.18	0.0761	3.357	BLK,CXCL12,DLK1,ELANE,FGF10,FGF7,MMP10,MMP11,MMP16,NGFR,PROK1,RASD1,TGFB3,VEGFD,WNT9B
nNOS Signaling in Neurons	1.15	0.111	#NUM!	CAPN11,CAPN3,CAPN8,GRIN2C,RASD1
STAT3 Pathway	1.14	0.0815	1.414	HGF,IGF1,IL1A,IL1R2,IL20RB,NGFR,NTRK1,PDGFRA,PDGFRB,RASD1,SOCS2
PPAR Signaling	1.13	0.0865	-0.378	IL1A,IL1R2,IL33,IL36G,NGFR,NR2F1,PDGFRA,PDGFRB,RASD1
Antiproliferative Role of Somatostatin Receptor 2	1.13	0.0946	#NUM!	GAD1,GAST,GNG4,GUCY1A1,GUCY1A2,NPR1,RASD1
Acute Phase Response Signaling	1.13	0.0761	-0.707	AMBP,APOA2,C4BPA,CFB,FN1,IL1A,IL33,IL36G,ITIH3,NGFR,ORM1,ORM2,RASD1,SOCS2
Caveolar-mediated Endocytosis Signaling	1.11	0.0933	#NUM!	ACTA1,ACTA2,ACTG2,FLNC,ITGA1,ITGA11,ITGA8
Leptin Signaling in Obesity	1.11	0.0933	#NUM!	ADCY1,ADCY5,ADCY8,GUCY1A1,LEP,NPY,PLCL1
Sertoli Cell-Sertoli Cell Junction Signaling	1.1	0.0743	#NUM!	ACTA1,ACTA2,ACTG2,CLDN18,CLDN5,CLDN6,CTNNA2,GUCY1A1,GUCY1A2,ITGA1,ITGA11,ITGA8,PRKG1,RASD1,TGFB3
Retinoate Biosynthesis I	1.1	0.121	0	ADH1C,ADH7,ALDH1A3,RDH10
α-Adrenergic Signaling	1.09	0.0849	#NUM!	ADCY1,ADCY5,ADCY8,ADRA2A,GNG4,GUCY1A1,PHKG1,RASD1,SLC8A2
The Visual Cycle	1.08	0.143	#NUM!	LRAT,RDH10,RPE65
Embryonic Stem Cell Differentiation into Cardiac Lineages	1.07	0.2	#NUM!	GATA4,ISL1
GDP-glucose Biosynthesis	1.07	0.2	#NUM!	HKDC1,PGM5
FXR/RXR Activation	1.03	0.08	#NUM!	AMBP,APOA2,APOD,APOF,IL1A,IL33,IL36G,ORM1,ORM2,SLCO1B3
Acetone Degradation I (to Methylglyoxal)	1.03	0.114	0	CYP1A1,CYP2C18,CYP2F1,CYP4B1
Regulation of Actin-based Motility by Rho	1.02	0.0818	1.342	ACTA1,ACTA2,ACTG2,ITGA1,ITGA11,ITGA8,MYL3,MYLK,RND1
L-dopachrome Biosynthesis	1.01	0.5	#NUM!	TYR
Thyroid Hormone Biosynthesis	1.01	0.5	#NUM!	TPO
Glutamate Dependent Acid Resistance	1.01	0.5	#NUM!	GAD1
Phospholipases	1.01	0.0938	1	PLA2G2C,PLA2G4D,PLA2G5,PLAAT5,PLCL1,PLD5
Regulation Of The Epithelial Mesenchymal Transition By Growth Factors Pathway	1.01	0.0729	1.508	CDH12,FGF1,FGF10,FGF7,HGF,HMGA2,NGFR,PDGFRA,PDGFRB,RASD1,TGFB3,TNFSF11,TNFSF9,ZEB1
HMGB1 Signaling	1.01	0.0755	0.447	IL12A,IL17B,IL1A,IL33,IL36G,LEP,NGFR,RASD1,RND1,TGFB3,TNFSF11,TNFSF9
Glucose and Glucose-1-phosphate Degradation	0.997	0.182	#NUM!	HKDC1,PGM5
Apelin Cardiac Fibroblast Signaling Pathway	0.986	0.13	#NUM!	APLNR,CCN2,TGFB3
Synaptic Long Term Potentiation	0.982	0.0781	2.121	ADCY1,ADCY8,CACNA1C,GRIA1,GRIA2,GRIA3,GRIN2C,PLCL1,PPP1R14A,RASD1
IL-17 Signaling	0.96	0.0726	0.832	CXCL5,IL12A,IL17B,IL1A,IL33,IL36G,LEP,PROK1,RASD1,TGFB3,TNFSF11,TNFSF9,VEGFD
Transcriptional Regulatory Network in Embryonic Stem Cells	0.95	0.0736	1.732	CALB1,ESX1,FOXD3,GATA4,IGF1,IGF2,ISL1,NOG,PAX6,RASD1,TGFB3,WNT9B
CDK5 Signaling	0.945	0.0789	1.633	ADCY1,ADCY5,ADCY8,GUCY1A1,LAMA2,MAPT,NGFR,PPP1R14A,RASD1
Bladder Cancer Signaling	0.945	0.0789	#NUM!	FGF1,FGF10,FGF7,MMP10,MMP11,MMP16,PROK1,RASD1,VEGFD
Role of Cytokines in Mediating Communication between Immune Cells	0.941	0.0962	#NUM!	IL12A,IL1A,IL20,IL33,IL36G
Apelin Adipocyte Signaling Pathway	0.87	0.0814	-1.633	ADCY1,ADCY5,ADCY8,APLNR,GUCY1A1,LIPE,NOX4
LPS/IL-1 Mediated Inhibition of RXR Function	0.863	0.0679	0	ACOX2,ALDH1A3,CYP2C18,CYP2F1,FABP4,FABP7,FMO1,GSTA2,GSTM5,IL1A,IL1R2,IL33,IL36G,NGFR,SLCO1B3
Methionine Salvage II (Mammalian)	0.849	0.333	#NUM!	BHMT
p38 MAPK Signaling	0.847	0.075	0	HSPB7,IL1A,IL1R2,IL33,IL36G,MAPT,PLA2G4D,PLA2G5,TGFB3
Estrogen Receptor Signaling	0.843	0.0623	3.9	ADCY1,ADCY5,ADCY8,CACNA1C,CACNA2D2,CACNG5,CACNG8,ESR1,GNG4,GUCY1A1,IGF1,IGF2,LEP,MMP10,MMP11,MMP16,MT-ND1,MYL3,PGR,PLCL1,PROK1,RASD1,RUNX2,SHE,VEGFD
DHCR24 Signaling Pathway	0.842	0.073	0.632	AMBP,APOA2,APOD,APOF,ESR1,IGF1,MAPT,ORM1,ORM2,RASD1
Mechanisms of Viral Exit from Host Cells	0.84	0.0976	#NUM!	ACTA1,ACTA2,ACTG2,SH3GL2
Role of IL-17A in Psoriasis	0.821	0.143	#NUM!	CXCL5,CXCL6
RHOA Signaling	0.816	0.0738	1	ACTA1,ACTA2,ACTG2,ARHGAP6,DLC1,IGF1,LPAR4,MYL3,MYLK
BMP signaling pathway	0.815	0.0787	0	BMP8A,CHRD,GREM1,NOG,RASD1,RUNX2,ZNF423
Triacylglycerol Degradation	0.813	0.0952	1	CES1,LIPE,LIPF,RPE65
Ethanol Degradation II	0.796	0.107	#NUM!	ADH1C,ADH7,ALDH1A3
Role of Macrophages, Fibroblasts and Endothelial Cells in Rheumatoid Arthritis	0.78	0.0629	#NUM!	CXCL12,DKK3,FN1,FRZB,IL1A,IL1R2,IL33,IL36G,LRP1,NGFR,PLCL1,PROK1,PRSS1,PRSS3,RASD1,SFRP2,SFRP4,TNFSF11,VEGFD,WNT9B
CDX Gastrointestinal Cancer Signaling Pathway	0.762	0.0667	-0.277	BMP8A,CA1,IL12A,IL17B,IL1A,IL33,IL36G,LEP,NOX4,TGFB3,TNFSF11,TNFSF9,WNT9B
tRNA Splicing	0.737	0.0889	#NUM!	ENPP1,PDE1A,PDE1B,PDE2A
Phenylethylamine Degradation I	0.735	0.25	#NUM!	AOC3
Eumelanin Biosynthesis	0.735	0.25	#NUM!	TYR
Taurine Biosynthesis	0.735	0.25	#NUM!	FMO1
Lactose Degradation III	0.735	0.25	#NUM!	GLB1L3
Noradrenaline and Adrenaline Degradation	0.733	0.1	#NUM!	ADH1C,ADH7,ALDH1A3
Extrinsic Prothrombin Activation Pathway	0.728	0.125	#NUM!	F12,F5
Neuroinflammation Signaling Pathway	0.719	0.0619	2.138	CALB1,CX3CR1,CXCL10,CXCL12,GABRA5,GABRE,GAD1,GJB1,GRIA1,GRIN2C,IL12A,KLK3,MAPT,NOX4,PLA2G4D,PLA2G5,SLC1A2,SLC6A1,TGFB3
G Beta Gamma Signaling	0.717	0.0698	1.414	ADCY1,CACNA1C,CACNA1G,CACNA1H,CACNA2D2,CACNG5,CACNG8,GNG4,RASD1
Role of IL-17F in Allergic Inflammatory Airway Diseases	0.714	0.087	#NUM!	CXCL10,CXCL5,CXCL6,IGF1
ID1 Signaling Pathway	0.708	0.065	1.941	BHLHE22,BLK,CCN2,CHRNA9,FN1,GLI2,IGF2,KLF17,NGFR,PROK1,RASD1,TGFB3,VEGFD
Sonic Hedgehog Signaling	0.704	0.0968	#NUM!	CCNB3,GLI2,GLIS1
Xenobiotic Metabolism AHR Signaling Pathway	0.703	0.0759	1.633	ABCG2,ALDH1A3,CYP1A1,GSTA2,GSTM5,IL1A
Thrombin Signaling	0.687	0.0636	0.707	ADCY1,ADCY5,ADCY8,ARHGEF15,F2R,F2RL2,GATA4,GNG4,GUCY1A1,MYL3,MYLK,PLCL1,RASD1,RND1
Role of Hypercytokinemia/hyperchemokinemia in the Pathogenesis of Influenza	0.686	0.075	-1.633	CXCL10,IL12A,IL1A,IL33,IL36G,S1PR1
Factors Promoting Cardiogenesis in Vertebrates	0.685	0.0671	1.667	BMP8A,CER1,GATA4,LRP1,NOG,NOX4,PLCL1,TBX5,TGFB3,WNT9B
Inhibition of Angiogenesis by TSP1	0.676	0.0938	#NUM!	GUCY1A1,GUCY1A2,HSPG2
Melanocyte Development and Pigmentation Signaling	0.67	0.0714	#NUM!	ADCY1,ADCY5,ADCY8,GUCY1A1,PAX3,RASD1,TYR
Role of MAPK Signaling in the Pathogenesis of Influenza	0.67	0.0741	#NUM!	CXCL10,PLA2G2C,PLA2G4D,PLA2G5,PLAAT5,RASD1
Erythropoietin Signaling Pathway	0.67	0.0655	-0.302	HBQ1,IL12A,IL17B,IL1A,IL33,IL36G,LEP,RASD1,TGFB3,TNFSF11,TNFSF9
Creatine-phosphate Biosynthesis	0.648	0.2	#NUM!	CKMT1A/CKMT1B
Glutamate Degradation III (via 4-aminobutyrate)	0.648	0.2	#NUM!	GAD1
GNRH Signaling	0.648	0.0638	#NUM!	ADCY1,ADCY5,ADCY8,CACNA1C,CACNA1G,CACNA1H,CACNA2D2,CACNG5,CACNG8,GNG4,GUCY1A1,RASD1
PAK Signaling	0.647	0.0684	1	ITGA1,ITGA11,ITGA8,MYL3,MYLK,PDGFRA,PDGFRB,RASD1
Remodeling of Epithelial Adherens Junctions	0.639	0.0758	#NUM!	ACTA1,ACTA2,ACTG2,CTNNA2,HGF
Amyloid Processing	0.628	0.08	2	CAPN11,CAPN3,CAPN8,MAPT
TR/RXR Activation	0.623	0.0714	#NUM!	ADRB1,COL6A3,DIO2,DIO3,PCK1,THRSP
Colorectal Cancer Metastasis Signaling	0.619	0.0606	3.162	ADCY1,ADCY5,ADCY8,GNG4,GUCY1A1,LRP1,MMP10,MMP11,MMP16,PROK1,PTGER3,RASD1,RND1,TGFB3,VEGFD,WNT9B
Myelination Signaling Pathway	0.616	0.0594	2.982	ARHGAP6,BLK,BMP8A,CNTN6,DLC1,ERBB4,GLI2,GLIS1,HES5,IGF1,KLK3,LAMA2,LAMA4,MPZ,NGFR,PDGFRA,PDGFRB,RASD1,WNT9B
Coagulation System	0.601	0.0857	#NUM!	F12,F2R,F5
Chondroitin and Dermatan Biosynthesis	0.58	0.167	#NUM!	CHSY3
Tryptophan Degradation to 2-amino-3-carboxymuconate Semialdehyde	0.58	0.167	#NUM!	IDO1
IGF-1 Signaling	0.575	0.0667	#NUM!	CCN2,IGF1,IGFBP1,IGFBP4,IGFBP5,RASD1,SOCS2
Phototransduction Pathway	0.571	0.0755	#NUM!	CNGB1,GUCY1A1,GUCY1A2,NPR1
Paxillin Signaling	0.563	0.066	#NUM!	ACTA1,ACTA2,ACTG2,ITGA1,ITGA11,ITGA8,RASD1
Endocannabinoid Developing Neuron Pathway	0.529	0.063	-1.342	ADCY1,ADCY5,ADCY8,GNG4,GUCY1A1,PAX6,RASD1,STMN2
Ephrin Receptor Signaling	0.527	0.0597	1	ARHGEF15,CXCL12,EFNA2,FGF1,GNG4,GRIN2C,ITGA1,ITGA11,ITGA8,PROK1,RASD1,VEGFD
Aspartate Degradation II	0.523	0.143	#NUM!	LIPF
PPARα/RXRα Activation	0.522	0.0601	0	ADCY1,ADCY5,ADCY8,APOA2,CYP2C18,GUCY1A1,IL1R2,NR2F1,PLCL1,RASD1,TGFB3
Role of Pattern Recognition Receptors in Recognition of Bacteria and Viruses	0.522	0.0616	#NUM!	IL12A,IL17B,IL1A,IL33,IL36G,LEP,TGFB3,TNFSF11,TNFSF9
IL-6 Signaling	0.508	0.062	0.378	COL1A1,HSPB7,IL1A,IL1R2,IL33,IL36G,NGFR,RASD1
Differential Regulation of Cytokine Production in Intestinal Epithelial Cells by IL-17A and IL-17F	0.498	0.087	#NUM!	IL12A,IL1A
Pyrimidine Deoxyribonucleotides De Novo Biosynthesis I	0.498	0.087	#NUM!	AK5,PCK1
Integrin Signaling	0.494	0.0585	3.162	ACTA1,ACTA2,ACTG2,CAPN11,CAPN3,CAPN8,ITGA1,ITGA11,ITGA8,MYLK,RASD1,RND1
Role of MAPK Signaling in Inhibiting the Pathogenesis of Influenza	0.487	0.0658	0.447	CXCL10,PLA2G2C,PLA2G4D,PLA2G5,PLAAT5
P2Y Purigenic Receptor Signaling Pathway	0.478	0.0606	1.342	ADCY1,ADCY5,ADCY8,GNG4,GUCY1A1,P2RY12,PLCL1,RASD1
Histidine Degradation III	0.475	0.125	#NUM!	AMDHD1
Sphingomyelin Metabolism	0.475	0.125	#NUM!	SMPD3
Type II Diabetes Mellitus Signaling	0.475	0.0596	#NUM!	CACNA1C,CACNA1G,CACNA1H,CACNA2D2,CACNG5,CACNG8,NGFR,SMPD3,SOCS2
PTEN Signaling	0.475	0.0596	-2.236	ITGA1,ITGA11,ITGA8,NGFR,NTRK1,PDGFRA,PDGFRB,PREX2,RASD1
Role of JAK family kinases in IL-6-type Cytokine Signaling	0.474	0.0649	2.236	PROK1,SERPINA12,SERPINA9,TGFB3,VEGFD
Signaling by Rho Family GTPases	0.471	0.0566	1.897	ACTA1,ACTA2,ACTG2,ARHGEF15,CDH11,CDH12,DES,GNG4,ITGA1,ITGA11,ITGA8,MYL3,MYLK,NOX4,RND1
IL-1 Signaling	0.466	0.0625	#NUM!	ADCY1,ADCY5,ADCY8,GNG4,GUCY1A1,IL1A
WNT/β-catenin Signaling	0.464	0.0585	-1	CDH12,DKK3,FRZB,LRP1,SFRP2,SFRP4,SOX17,SOX21,TGFB3,WNT9B
IL-13 Signaling Pathway	0.461	0.0609	1.89	AGR2,ANO1,BLK,CXCL6,IL33,POSTN,TGFB3
Neuregulin Signaling	0.461	0.0609	#NUM!	DCN,ERBB4,ITGA1,ITGA11,ITGA8,NRG3,RASD1
VEGF Signaling	0.455	0.0619	2.236	ACTA1,ACTA2,ACTG2,PROK1,RASD1,VEGFD
Tryptophan Degradation III (Eukaryotic)	0.451	0.08	#NUM!	CA1,IDO1
Dopamine Receptor Signaling	0.449	0.0633	#NUM!	ADCY1,ADCY5,ADCY8,GUCY1A1,PPP1R14A
SPINK1 General Cancer Pathway	0.445	0.0656	#NUM!	MT1H,PRSS1,PRSS3,RASD1
Apelin Cardiomyocyte Signaling Pathway	0.444	0.0612	0.816	APLNR,MYL3,MYLK,PLCL1,PLN,SLC8A2
Regulation of the Epithelial-Mesenchymal Transition Pathway	0.44	0.057	#NUM!	CDH12,FGF1,FGF10,FGF7,HGF,HMGA2,PDGFRB,RASD1,TGFB3,WNT9B,ZEB1
Pathogenesis of Multiple Sclerosis	0.435	0.111	#NUM!	CXCL10
Salvage Pathways of Pyrimidine Deoxyribonucleotides	0.435	0.111	#NUM!	AICDA
Estrogen-mediated S-phase Entry	0.429	0.0769	#NUM!	CCNA1,ESR1
Glutathione-mediated Detoxification	0.429	0.0769	#NUM!	GSTA2,GSTM5
Neuropathic Pain Signaling In Dorsal Horn Neurons	0.423	0.06	2.449	GRIA1,GRIA2,GRIA3,GRIN2C,PLCL1,TAC1
IL-4 Signaling	0.42	0.0541	4.472	ANO1,COL10A1,COL11A1,COL12A1,COL18A1,COL1A1,COL1A2,COL24A1,COL2A1,COL3A1,COL4A6,COL5A1,COL5A2,COL5A3,COL6A3,COL9A3,FCER2,RASD1,TGFB3,TIMP3
Apelin Endothelial Signaling Pathway	0.414	0.0576	-0.447	ADCY1,ADCY5,ADCY8,APLNR,GNG4,GUCY1A1,RASD1,TEK
MSP-RON Signaling In Cancer Cells Pathway	0.414	0.0576	1.414	ACTA2,F12,KLK14,KLK2,KLK3,PROK1,RASD1,VEGFD
IL-15 Production	0.413	0.0583	1.89	BLK,ERBB4,NTRK1,PDGFRA,PDGFRB,ROS1,TEK
Human Embryonic Stem Cell Pluripotency	0.411	0.0558	2.111	BMP8A,FOXD3,KLK3,LEFTY2,NOG,NTRK1,PDGFRA,PDGFRB,RASD1,TGFB3,WNT9B
Prostanoid Biosynthesis	0.399	0.1	#NUM!	PTGDS
Oleate Biosynthesis II (Animals)	0.399	0.1	#NUM!	PTPRT
Glycine Betaine Degradation	0.399	0.1	#NUM!	BHMT
Macrophage Classical Activation Signaling Pathway	0.394	0.0556	0	CXCL10,IL12A,IL17B,IL1A,IL33,IL36G,LEP,TGFB3,TNFSF11,TNFSF9
VEGF Family Ligand-Receptor Interactions	0.392	0.0595	#NUM!	NRP1,PLA2G4D,PLA2G5,RASD1,VEGFD
Role of Tissue Factor in Cancer	0.383	0.0547	2.111	BLK,CCN2,F2R,FLNC,HGF,NGFR,PRSS1,PRSS3,RASD1,TGFB3,ZEB1
NAD biosynthesis II (from tryptophan)	0.368	0.0909	#NUM!	IDO1
Glycogen Degradation II	0.368	0.0909	#NUM!	PGM5
CXCR4 Signaling	0.355	0.0542	-0.447	ADCY1,ADCY5,ADCY8,CXCL12,GNG4,GUCY1A1,MYL3,RASD1,RND1
Androgen Signaling	0.348	0.0539	2.449	CACNA1C,CACNA1G,CACNA1H,CACNA2D2,CACNG5,CACNG8,GNG4,TAF4B,TGFB1I1
MYC Mediated Apoptosis Signaling	0.342	0.06	#NUM!	ADRB1,ADRB3,NGFR
UDP-N-acetyl-D-galactosamine Biosynthesis II	0.34	0.0833	#NUM!	HKDC1
Antioxidant Action of Vitamin C	0.339	0.055	-1	PLA2G2C,PLA2G4D,PLA2G5,PLAAT5,PLCL1,PLD5
Basal Cell Carcinoma Signaling	0.337	0.0571	#NUM!	BMP8A,GLI2,GLIS1,WNT9B
Role of MAPK Signaling in Promoting the Pathogenesis of Influenza	0.331	0.0545	1.633	ATP6V0D2,PLA2G2C,PLA2G4D,PLA2G5,PLAAT5,RASD1
Growth Hormone Signaling	0.326	0.0563	#NUM!	CSH1/CSH2,IGF1,IGF2,SOCS2
Glioma Invasiveness Signaling	0.326	0.0563	#NUM!	F2R,RASD1,RND1,TIMP3
Granzyme A Signaling	0.326	0.0563	1	F2R,FN1,H1-1,MT-ND1
Actin Nucleation by ARP-WASP Complex	0.324	0.0549	#NUM!	ITGA1,ITGA11,ITGA8,RASD1,RND1
NRF2-mediated Oxidative Stress Response	0.321	0.0521	#NUM!	ACTA1,ACTA2,ACTG2,CYP1A1,CYP2C18,CYP2F1,FMO1,FOSL1,GSTA2,GSTM5,RASD1
Iron homeostasis signaling pathway	0.315	0.053	#NUM!	ATP6V0D2,BMP8A,HBQ1,LRP1,PDGFRA,PDGFRB,SLC40A1
Glycogen Degradation III	0.315	0.0769	#NUM!	PGM5
Bile Acid Biosynthesis, Neutral Pathway	0.315	0.0769	#NUM!	AKR1D1
Histamine Degradation	0.315	0.0769	#NUM!	ALDH1A3
Xenobiotic Metabolism CAR Signaling Pathway	0.315	0.0523	3	ALDH1A3,CYP1A1,FMO1,GSTA2,GSTM5,UGT2B11,UGT2B15,UGT2B17,UGT2B28
Gα12/13 Signaling	0.308	0.0526	1.633	CDH11,CDH12,F2R,F2RL2,LPAR4,MYL3,RASD1
Chondroitin Sulfate Degradation (Metazoa)	0.293	0.0714	#NUM!	CEMIP
Choline Biosynthesis III	0.293	0.0714	#NUM!	PLD5
NOD1/2 Signaling Pathway	0.291	0.0511	0.333	IL12A,IL17B,IL1A,IL33,IL36G,LEP,TGFB3,TNFSF11,TNFSF9
Xenobiotic Metabolism PXR Signaling Pathway	0.291	0.0511	3	ALDH1A3,CES1,GSTA2,GSTM5,PPP1R14A,UGT2B11,UGT2B15,UGT2B17,UGT2B28
MSP-RON Signaling In Macrophages Pathway	0.285	0.0517	0.816	F12,IL12A,KLK14,KLK2,KLK3,RASD1
CSDE1 Signaling Pathway	0.285	0.0545	#NUM!	FABP7,FN1,TNC
Adipogenesis pathway	0.281	0.0511	1.134	DLK1,EBF1,FABP4,FGF1,LEP,RUNX1T1,ZNF423
Angiopoietin Signaling	0.28	0.0526	#NUM!	ANGPT4,ANGPTL1,RASD1,TEK
Cholecystokinin/Gastrin-mediated Signaling	0.278	0.0513	-1	GAST,IL1A,IL33,IL36G,RASD1,RND1
Xenobiotic Metabolism General Signaling Pathway	0.275	0.0507	2.646	GSTA2,GSTM5,RASD1,UGT2B11,UGT2B15,UGT2B17,UGT2B28
Androgen Biosynthesis	0.272	0.0667	#NUM!	SRD5A2
Leukotriene Biosynthesis	0.272	0.0667	#NUM!	DPEP1
Dermatan Sulfate Degradation (Metazoa)	0.272	0.0667	#NUM!	CEMIP
Thyroid Cancer Signaling	0.271	0.0519	2	IGF1,KLK3,NTRK1,RASD1
Toll-like Receptor Signaling	0.271	0.0519	#NUM!	IL12A,IL1A,IL33,IL36G
HOTAIR Regulatory Pathway	0.271	0.0503	2.646	COL1A1,COL1A2,COL3A1,ESR1,MMP10,MMP11,MMP16,WNT9B
MIF-mediated Glucocorticoid Regulation	0.268	0.0556	#NUM!	PLA2G4D,PLA2G5
Neurotrophin/TRK Signaling	0.263	0.0513	#NUM!	KLK3,NGFR,NTRK1,RASD1
Pyrimidine Ribonucleotides Interconversion	0.256	0.0541	#NUM!	AK5,PCK1
Fatty Acid α-oxidation	0.254	0.0625	#NUM!	ALDH1A3
Parkinson's Signaling	0.254	0.0625	#NUM!	UCHL1
WNK Renal Signaling Pathway	0.253	0.05	2.236	ASIC2,IGF1,SCNN1A,SCNN1B,SLC12A5
Estrogen-Dependent Breast Cancer Signaling	0.247	0.05	#NUM!	ESR1,HSD17B2,IGF1,RASD1
Putrescine Degradation III	0.237	0.0588	#NUM!	ALDH1A3
Pyrimidine Ribonucleotides De Novo Biosynthesis	0.224	0.05	#NUM!	AK5,PCK1
Differential Regulation of Cytokine Production in Macrophages and T Helper Cells by IL-17A and IL-17F	0.222	0.0556	#NUM!	IL12A
Glutaryl-CoA Degradation	0.222	0.0556	#NUM!	CA1
Histidine Degradation VI	0.222	0.0556	#NUM!	AMDHD1
Tryptophan Degradation X (Mammalian, via Tryptamine)	0.208	0.0526	#NUM!	ALDH1A3
Ethanol Degradation IV	0.195	0.05	#NUM!	ALDH1A3
NAD Signaling Pathway	0	0.0345	-0.447	H1-1,HGF,IGF1,NKX2-1,PRDM13
Pyroptosis Signaling Pathway	0	0.0444	0	GBP5,IL1A,NGFR,NLRP4
CLEAR Signaling Pathway	0	0.032	-2.333	ATP6V0D2,HGF,IGF1,NGFR,NTRK1,PDGFRA,PDGFRB,RASD1,TNFSF11
Immunogenic Cell Death Signaling Pathway	0	0.0357	#NUM!	CXCL10,LRP1,NGFR
MicroRNA Biogenesis Signaling Pathway	0	0.0328	1.633	ESR1,HGF,HOPX,IGF1,RASD1,TGFB3
Ribonucleotide Reductase Signaling Pathway	0	0.0118	#NUM!	ESR1,HGF
Glucocorticoid Receptor Signaling	0	0.0406	#NUM!	DNALI1,ESR1,IGF1,IL1A,IL1R2,IL20RB,KRT13,KRT16,KRT222,KRT37,KRT6A,KRT79,MT-ND1,PCK1,PDK4,PGR,PLA2G4D,PLA2G5,RASD1,TAF4B,TAT,TGFB3
Natural Killer Cell Signaling	0	0.0466	-2.333	COL10A1,COL18A1,COL1A1,COL1A2,COL2A1,COL3A1,COL5A3,IL12A,RASD1
IL-10 Signaling	0	0.0331	1.342	CCN4,IL1A,IL1R2,IL33,IL36G
Macrophage Alternative Activation Signaling Pathway	0	0.0444	0.707	FCER2,IL12A,IL1A,IL1R2,IL33,IL36G,MARCO,TGFB3
Fc Epsilon RI Signaling	0	0.0339	#NUM!	MS4A2,PLA2G4D,PLA2G5,RASD1
Huntington's Disease Signaling	0	0.0252	2.236	CAPN11,CAPN3,CAPN8,GNG4,IGF1,NTRK1,PENK
Chaperone Mediated Autophagy Signaling Pathway	0	0.03	-2.496	ATP6V0D2,MAPT,MMP10,MMP11,MMP16,MTRNR2L1,MTRNR2L10,MTRNR2L12,MTRNR2L13,MTRNR2L3,MTRNR2L6,PAX2,UCHL1
IL-33 Signaling Pathway	0	0.0339	0.816	CMA1,CTSG,ELANE,IL1A,IL33,IL36G
p53 Signaling	0	0.0102	#NUM!	ADGRB1
Mitochondrial Dysfunction	0	0.0424	-0.535	ADRB3,ATP1A2,CACNA1C,CACNA1G,CACNA1H,CACNA2D2,CACNG5,CACNG8,CAPN11,CAPN3,CAPN8,COX7A1,MAPT,MT-ND1
Ceramide Signaling	0	0.044	#NUM!	NGFR,RASD1,S1PR1,SMPD3
PXR/RXR Activation	0	0.0476	#NUM!	GSTA2,IGFBP1,SLCO1B3
14-3-3-mediated Signaling	0	0.0238	#NUM!	MAPT,PLCL1,RASD1
Fcγ Receptor-mediated Phagocytosis in Macrophages and Monocytes	0	0.043	#NUM!	ACTA1,ACTA2,ACTG2,PLD5
IL-8 Signaling	0	0.0388	2	GNG4,NOX4,PLD5,PROK1,RASD1,RND1,TEK,VEGFD
Role of PKR in Interferon Induction and Antiviral Response	0	0.0303	#NUM!	MARCO,NLRP4,PDGFRB,SCARA5
TREM1 Signaling	0	0.0139	#NUM!	NLRP4
MIF Regulation of Innate Immunity	0	0.0455	#NUM!	PLA2G4D,PLA2G5
Role of NFAT in Regulation of the Immune Response	0	0.00702	#NUM!	GATA4,GNG4,MS4A2,RASD1
FcγRIIB Signaling in B Lymphocytes	0	0.0257	#NUM!	CACNA1C,CACNA1G,CACNA1H,CACNA2D2,CACNG5,CACNG8,RASD1
LPS-stimulated MAPK Signaling	0	0.0118	#NUM!	RASD1
NF-κB Activation by Viruses	0	0.0128	#NUM!	RASD1
CCR5 Signaling in Macrophages	0	0.0236	#NUM!	CACNA1C,CACNA1G,CACNA1H,CACNA2D2,CACNG5,CACNG8,GNG4
CD40 Signaling	0	0.0152	#NUM!	FCER2
IL-3 Signaling	0	0.0127	#NUM!	RASD1
fMLP Signaling in Neutrophils	0	0.0233	#NUM!	GNG4,NOX4,RASD1
4-1BB Signaling in T Lymphocytes	0	0.0294	#NUM!	TNFSF9
Thrombopoietin Signaling	0	0.0159	#NUM!	RASD1
CTLA4 Signaling in Cytotoxic T Lymphocytes	0	0.0134	-0.447	BLK,IDO1,PLD5,RASD1,TGFB3
Induction of Apoptosis by HIV1	0	0.0159	#NUM!	NGFR
T Helper Cell Differentiation	0	0.00749	#NUM!	IL12A,NGFR
IL-9 Signaling	0	0.0286	#NUM!	SOCS2
CCR3 Signaling in Eosinophils	0	0.0385	#NUM!	GNG4,MYLK,PLA2G4D,PLA2G5,RASD1
Oncostatin M Signaling	0	0.0465	#NUM!	RASD1,TIMP3
IL-15 Signaling	0	0.00377	#NUM!	RASD1
Virus Entry via Endocytic Pathways	0	0.0427	#NUM!	ACTA1,ACTA2,ACTG2,FLNC,RASD1
Dendritic Cell Maturation	0	0.039	1.807	CD1A,COL10A1,COL18A1,COL1A1,COL1A2,COL2A1,COL3A1,COL5A3,IL12A,IL1A,IL33,IL36G,LEP,NGFR,PLCL1
Reelin Signaling in Neurons	0	0.0435	2.236	ARHGEF15,BLK,DNALI1,GRIN2C,MAPT,PDK4
HIF1α Signaling	0	0.049	3.162	HGF,IGF1,IGF2,MMP10,MMP11,MMP16,NOX4,PROK1,RASD1,VEGFD
Melatonin Signaling	0	0.0145	#NUM!	PLCL1
CNTF Signaling	0	0.0179	#NUM!	RASD1
Cardiomyocyte Differentiation via BMP Receptors	0	0.0385	#NUM!	GATA4
Renin-Angiotensin Signaling	0	0.0496	#NUM!	ADCY1,ADCY5,ADCY8,GUCY1A1,RASD1,SHE
Docosahexaenoic Acid (DHA) Signaling	0	0.0263	#NUM!	BCL2A1
Semaphorin Signaling in Neurons	0	0.0339	#NUM!	NRP1,RND1
Molecular Mechanisms of Cancer	0	0.0406	#NUM!	ADCY1,ADCY5,ADCY8,ARHGEF15,BMP8A,CDK15,CTNNA2,DHH,GNG4,GUCY1A1,ITGA1,ITGA11,ITGA8,LRP1,RASD1,RND1,TGFB3,WNT9B
Lipid Antigen Presentation by CD1	0	0.00472	#NUM!	CD1A
Mitotic Roles of Polo-Like Kinase	0	0.0156	#NUM!	CCNB3
HGF Signaling	0	0.0382	#NUM!	HGF,ITGA1,ITGA11,ITGA8,RASD1
FLT3 Signaling in Hematopoietic Progenitor Cells	0	0.0123	#NUM!	RASD1
DNA Methylation and Transcriptional Repression Signaling	0	0.0309	#NUM!	AICDA,CDK15,ZEB1
ATM Signaling	0	0.0202	#NUM!	CCNB3,ZEB1
Role of OCT4 in Mammalian Embryonic Stem Cell Pluripotency	0	0.0444	#NUM!	FOXD3,NR2F1
Germ Cell-Sertoli Cell Junction Signaling	0	0.0422	#NUM!	ACTA1,ACTA2,ACTG2,CTNNA2,RASD1,RND1,TGFB3
Aldosterone Signaling in Epithelial Cells	0	0.0476	2	ASIC2,HSPA12B,HSPB7,KCNJ8,KCNMA1,PLCL1,SCNN1A,SCNN1B
Role of NANOG in Mammalian Embryonic Stem Cell Pluripotency	0	0.0492	#NUM!	BMP8A,FOXD3,GATA4,RASD1,TCL1A,WNT9B
Prolactin Signaling	0	0.0421	#NUM!	KCNJ8,KCNMA1,RASD1,SOCS2
Melanoma Signaling	0	0.02	#NUM!	RASD1
Prostate Cancer Signaling	0	0.018	#NUM!	KLK3,RASD1
Renal Cell Carcinoma Signaling	0	0.0256	#NUM!	HGF,RASD1
Type I Diabetes Mellitus Signaling	0	0.0164	#NUM!	CPE,GAD1,IL12A,NGFR,SOCS2
Endometrial Cancer Signaling	0	0.0333	#NUM!	CTNNA2,RASD1
Primary Immunodeficiency Signaling	0	0.0196	#NUM!	AICDA
Glioma Signaling	0	0.041	2	IGF1,IGF2,PDGFRA,PDGFRB,RASD1
Autoimmune Thyroid Disease Signaling	0	0.004	#NUM!	TPO
Acute Myeloid Leukemia Signaling	0	0.0222	#NUM!	CCNA1,RASD1
Graft-versus-Host Disease Signaling	0	0.0124	#NUM!	IL1A,IL33,IL36G
Chronic Myeloid Leukemia Signaling	0	0.0333	1	BLK,GLI2,GLIS1,LIN28B,PAX5,PLCL1,RASD1,TGFB3,WNT9B
Non-Small Cell Lung Cancer Signaling	0	0.0108	#NUM!	RASD1
Production of Nitric Oxide and Reactive Oxygen Species in Macrophages	0	0.0426	-0.378	APOA2,APOD,APOF,NGFR,ORM1,ORM2,PPP1R14A,RND1
p70S6K Signaling	0	0.0157	2	F2R,F2RL2,MAPT,PLCL1,RASD1
ERK5 Signaling	0	0.0405	#NUM!	FOSL1,NTRK1,RASD1
mTOR Signaling	0	0.0244	#NUM!	PLD5,PROK1,RASD1,RND1,VEGFD
Pancreatic Adenocarcinoma Signaling	0	0.0323	#NUM!	PLD5,PROK1,TGFB3,VEGFD
G Protein Signaling Mediated by Tubby	0	0.00376	#NUM!	GNG4
Communication between Innate and Adaptive Immune Cells	0	0.0108	#NUM!	CXCL10,IL12A,IL1A,IL33,IL36G
Crosstalk between Dendritic Cells and Natural Killer Cells	0	0.044	#NUM!	ACTA1,ACTA2,ACTG2,IL12A
Systemic Lupus Erythematosus Signaling	0	0.0118	#NUM!	C6,C7,CD22,IL1A,IL33,IL36G,RASD1
CDC42 Signaling	0	0.0147	#NUM!	ITGA1,ITGA11,ITGA8,MYL3,MYLK
EIF2 Signaling	0	0.0236	#NUM!	ACTA1,ACTA2,ACTG2,NOX4,RASD1
AMPK Signaling	0	0.0332	0.447	ADRA2A,ADRB1,ADRB3,AK5,CHRNA9,GNG4,LEP,LIPE
Hereditary Breast Cancer Signaling	0	0.00719	#NUM!	RASD1
RAC Signaling	0	0.0365	#NUM!	ITGA1,ITGA11,ITGA8,NOX4,RASD1
Phospholipase C Signaling	0	0.0247	1.342	ADCY1,ADCY5,ADCY8,ARHGEF15,GNG4,GUCY1A1,ITGA1,ITGA11,ITGA8,MYL3,PLA2G4D,PLA2G5,PLD5,PPP1R14A,RASD1,RND1
Ovarian Cancer Signaling	0	0.0321	#NUM!	EDNRA,PROK1,RASD1,VEGFD,WNT9B
HER-2 Signaling in Breast Cancer	0	0.0269	0.816	BLK,COX7A1,IL1A,MS4A2,PGR,RASD1
Altered T Cell and B Cell Signaling in Rheumatoid Arthritis	0	0.0106	#NUM!	IL12A,IL1A,IL33,IL36G,TNFSF11
Regulation of eIF4 and p70S6K Signaling	0	0.0227	#NUM!	ITGA1,ITGA11,ITGA8,RASD1
RANK Signaling in Osteoclasts	0	0.0114	#NUM!	TNFSF11
Glioblastoma Multiforme Signaling	0	0.0476	2.449	IGF1,IGF2,PDGFRA,PDGFRB,PLCL1,RASD1,RND1,WNT9B
Regulation of IL-2 Expression in Activated and Anergic T Lymphocytes	0	0.00763	#NUM!	RASD1,TGFB3
Role of WNT/GSK-3β Signaling in the Pathogenesis of Influenza	0	0.0135	#NUM!	WNT9B
PKCθ Signaling in T Lymphocytes	0	0.0198	#NUM!	CACNA1C,CACNA1G,CACNA1H,CACNA2D2,CACNG5,CACNG8,RASD1
Antiproliferative Role of TOB in T Cell Signaling	0	0.00889	#NUM!	CCNA1,TGFB3
PI3K Signaling in B Lymphocytes	0	0.00923	#NUM!	BLK,PLCL1,RASD1
Cyclins and Cell Cycle Regulation	0	0.0476	-2	CCNA1,CCNB3,MYT1,TGFB3
Cell Cycle Control of Chromosomal Replication	0	0.0179	#NUM!	CDK15
Assembly of RNA Polymerase II Complex	0	0.02	#NUM!	TAF4B
IL-17A Signaling in Airway Cells	0	0.0299	#NUM!	CXCL5,CXCL6
Role of IL-17A in Arthritis	0	0.0351	#NUM!	CXCL5,CXCL6
IL-17A Signaling in Fibroblasts	0	0.0263	#NUM!	CXCL5
IL-17A Signaling in Gastric Cells	0	0.0385	#NUM!	CXCL10
Role of JAK1 and JAK3 in γc Cytokine Signaling	0	0.0149	#NUM!	RASD1
NGF Signaling	0	0.0336	#NUM!	NGFR,NTRK1,RASD1,SMPD3
Telomerase Signaling	0	0.00952	#NUM!	RASD1
Mouse Embryonic Stem Cell Pluripotency	0	0.0194	#NUM!	FOXD3,RASD1
Hematopoiesis from Pluripotent Stem Cells	0	0.00847	#NUM!	IL12A,IL1A
Ephrin A Signaling	0	0.0426	#NUM!	EFNA2,NGFR
Ephrin B Signaling	0	0.0278	#NUM!	CXCL12,GNG4
ERBB Signaling	0	0.0323	#NUM!	ERBB4,NRG3,RASD1
ERB2-ERBB3 Signaling	0	0.0312	#NUM!	NRG3,RASD1
ERBB4 Signaling	0	0.0455	#NUM!	ERBB4,NRG3,RASD1
GADD45 Signaling	0	0.0169	#NUM!	TGFB3
GDNF Family Ligand-Receptor Interactions	0	0.0395	#NUM!	GFRA1,GFRA3,RASD1
Heparan Sulfate Biosynthesis	0	0.0303	#NUM!	LIPE,RPE65
Dopamine Degradation	0	0.0417	#NUM!	ALDH1A3
Heparan Sulfate Biosynthesis (Late Stages)	0	0.0339	#NUM!	LIPE,RPE65
D-myo-inositol-5-phosphate Metabolism	0	0.026	#NUM!	ATP1A2,CILP,ENPP1,PPFIA2,PPP1R14A
Chondroitin Sulfate Biosynthesis	0	0.0189	#NUM!	CHSY3
Dermatan Sulfate Biosynthesis	0	0.0182	#NUM!	CHSY3
D-myo-inositol (1,4,5,6)-Tetrakisphosphate Biosynthesis	0	0.0284	#NUM!	ATP1A2,CILP,ENPP1,PPFIA2,PPP1R14A
Superpathway of Inositol Phosphate Compounds	0	0.0218	#NUM!	ATP1A2,CILP,ENPP1,PPFIA2,PPP1R14A
D-myo-inositol (3,4,5,6)-tetrakisphosphate Biosynthesis	0	0.0284	#NUM!	ATP1A2,CILP,ENPP1,PPFIA2,PPP1R14A
TCA Cycle II (Eukaryotic)	0	0.0455	#NUM!	LIPF
3-phosphoinositide Degradation	0	0.0321	2	ATP1A2,CILP,ENPP1,INPP4B,PPFIA2,PPP1R14A
3-phosphoinositide Biosynthesis	0	0.0248	#NUM!	ATP1A2,CILP,ENPP1,PPFIA2,PPP1R14A
Salvage Pathways of Pyrimidine Ribonucleotides	0	0.0312	#NUM!	AICDA,AK5,PCK1
Gluconeogenesis I	0	0.04	#NUM!	LIPF
Chondroitin Sulfate Biosynthesis (Late Stages)	0	0.0222	#NUM!	CHSY3
Superpathway of Methionine Degradation	0	0.0263	#NUM!	BHMT
DNA damage-induced 14-3-3σ Signaling	0	0.0217	#NUM!	CCNB3
Epithelial Adherens Junction Signaling	0	0.0321	-1.342	CTNNA2,FGF1,HGF,MYH4,RASD1
Gαq Signaling	0	0.0305	#NUM!	AVPR1A,CALCR,GNG4,PLD5,RND1
PEDF Signaling	0	0.0238	#NUM!	RASD1,ZEB1
TEC Kinase Signaling	0	0.0267	2.236	ACTA1,ACTA2,ACTG2,BLK,GNG4,ITGA1,ITGA11,ITGA8,MS4A2,RND1
UVA-Induced MAPK Signaling	0	0.0309	#NUM!	PLCL1,RASD1,SMPD3
UVC-Induced MAPK Signaling	0	0.0392	#NUM!	RASD1,SMPD3
Oxidative Phosphorylation	0	0.0189	#NUM!	COX7A1,MT-ND1
HIPPO signaling	0	0.0235	#NUM!	FAT4,PPP1R14A
PCP (Planar Cell Polarity) Pathway	0	0.0167	#NUM!	WNT9B
WNT/Ca+ pathway	0	0.0154	#NUM!	PLCL1
Cell Cycle: G1/S Checkpoint Regulation	0	0.0149	#NUM!	TGFB3
ERK/MAPK Signaling	0	0.0419	0.447	ESR1,HSPB7,ITGA1,ITGA11,ITGA8,PLA2G4D,PLA2G5,PPP1R14A,RASD1
SAPK/JNK Signaling	0	0.00664	#NUM!	GNG4,RASD1
PI3K/AKT Signaling	0	0.0303	#NUM!	IL1R2,IL20RB,ITGA1,ITGA11,ITGA8,RASD1
Protein Ubiquitination Pathway	0	0.0149	#NUM!	HSPA12B,HSPB7,UCHL1,USP44
IL-2 Signaling	0	0.0161	#NUM!	RASD1
FGF Signaling	0	0.0465	2	FGF1,FGF10,FGF7,HGF
JAK/STAT Signaling	0	0.0366	#NUM!	GAST,RASD1,SOCS2
Cell Cycle: G2/M DNA Damage Checkpoint Regulation	0	0.04	#NUM!	CCNB3,CKS2
Xenobiotic Metabolism Signaling	0	0.0441	#NUM!	ALDH1A3,CES1,CYP1A1,FMO1,GSTA2,GSTM5,IL1A,RASD1,UGT2B11,UGT2B15,UGT2B17,UGT2B28
B Cell Receptor Signaling	0	0.0136	#NUM!	BCL2A1,CD22,EBF1,PAX5,RASD1
Insulin Receptor Signaling	0	0.0441	1.342	ASIC2,LIPE,PPP1R14A,RASD1,SCNN1A,SCNN1B
Chemokine Signaling	0	0.026	#NUM!	CXCL12,RASD1
Death Receptor Signaling	0	0.0426	1	ACTA1,ACTA2,ACTG2,HSPB7
TGF-β Signaling	0	0.0417	#NUM!	RASD1,RUNX2,TGFB3,ZNF423
Apoptosis Signaling	0	0.049	2	BCL2A1,CAPN11,CAPN3,CAPN8,RASD1
Notch Signaling	0	0.027	#NUM!	HES5
NF-κB Signaling	0	0.0272	1	IL1A,IL1R2,IL33,IL36G,NGFR,NTRK1,PDGFRA,PDGFRB,RASD1,TNFSF11
T Cell Receptor Signaling	0	0.00264	#NUM!	RASD1
PDGF Signaling	0	0.0345	#NUM!	PDGFRA,PDGFRB,RASD1
Phagosome Maturation	0	0.0327	#NUM!	ATP6V0D2,CTSG,CTSK,NOX4,TPO
Autophagy	0	0.0188	0	HGF,IGF1,MAP1LC3C,NGFR
Macropinocytosis Signaling	0	0.0263	#NUM!	HGF,RASD1
PD-1, PD-L1 cancer immunotherapy pathway	0	0.0288	#NUM!	IL12A,NGFR,TGFB3
Cancer Drug Resistance By Drug Efflux	0	0.0345	#NUM!	ABCG2,RASD1
Sumoylation Pathway	0	0.0198	#NUM!	RND1,ZEB1
Th1 and Th2 Activation Pathway	0	0.024	#NUM!	IL12A,IL33,S1PR1,TNFSF11
Th1 Pathway	0	0.0171	#NUM!	IL12A,TNFSF11
Th2 Pathway	0	0.0226	#NUM!	IL12A,IL33,S1PR1
IL-7 Signaling Pathway	0	0.0411	#NUM!	EBF1,HGF,PAX5
Sirtuin Signaling Pathway	0	0.0175	0.447	H1-1,MAP1LC3C,MT-ND1,PCK1,SCNN1A
Th17 Activation Pathway	0	0.00356	#NUM!	IL12A
Endocannabinoid Cancer Inhibition Pathway	0	0.0479	-1.633	ADCY1,ADCY5,ADCY8,GUCY1A1,PROK1,SMPD3,VEGFD
Apelin Pancreas Signaling Pathway	0	0.0222	#NUM!	APLNR
Apelin Muscle Signaling Pathway	0	0.0417	#NUM!	APLNR,GNG4
BAG2 Signaling Pathway	0	0.0123	#NUM!	MAPT
FAT10 Cancer Signaling Pathway	0	0.04	#NUM!	NGFR,TGFB3
PFKFB4 Signaling Pathway	0	0.0208	#NUM!	TGFB3
T Cell Exhaustion Signaling Pathway	0	0.00554	#NUM!	IL12A,RASD1
IL-23 Signaling Pathway	0	0.0217	#NUM!	TNFSF11
Systemic Lupus Erythematosus In T Cell Signaling Pathway	0	0.00983	1	ESR1,LEP,RASD1,RND1
Systemic Lupus Erythematosus In B Cell Signaling Pathway	0	0.0288	0.832	CD22,IL12A,IL17B,IL1A,IL33,IL36G,LEP,RASD1,RASGRP2,SHE,TGFB3,TNFSF11,TNFSF9
Senescence Pathway	0	0.0442	2.53	CACNA1C,CACNA2D2,CACNG5,CACNG8,CAPN11,CAPN3,CAPN8,CCNB3,GATA4,IL1A,PDK4,RASD1,TGFB3
Inhibition of ARE-Mediated mRNA Degradation Pathway	0	0.0187	#NUM!	NGFR,TNFSF11,TNFSF9
BEX2 Signaling Pathway	0	0.0494	2	KLK3,NGFR,PROK1,VEGFD
Necroptosis Signaling Pathway	0	0.0392	1.633	CAPN11,CAPN3,CAPN8,NGFR,PLA2G4D,PLA2G5
Regulation Of The Epithelial Mesenchymal Transition In Development Pathway	0	0.0353	#NUM!	GLI2,GLIS1,WNT9B
Kinetochore Metaphase Signaling Pathway	0	0.0187	#NUM!	DNALI1,PPP1R14A
GM-CSF Signaling	0	0.0286	#NUM!	BCL2A1,RASD1
Ferroptosis Signaling Pathway	0	0.0236	#NUM!	ANGPTL4,NOX4,RASD1
